# Supplementary material for: Structural diversity and magnetic properties in 1D and 2D azido-bridged cobalt(ii) complexes with 1,2-bis(2-pyridyl)ethylene
Source: Royal Society of Chemistry journal article supplement (doi:10.1039/c0dt00853b), 2010-12-23
Supplement: c0dt00853b.pdf [file c0dt00853b.pdf]

# **Structural diversity and magnetic properties in 1D and 2D azido-bridged cobalt(II) complexes with 1,2-bis(2-pyridyl)ethylene**

*Jaurusup Boonmak,<sup>†</sup> Motohiro Nakano<sup>‡</sup> and Sujitra Youngme,<sup>\*,†</sup>*

\* Correspondence author: E-mail: [sujitra@kku.ac.th](mailto:sujitra@kku.ac.th); fax: +66-43-202-373.

<sup>†</sup> Department of Chemistry and Center of Excellence for Innovation in Chemistry, Faculty of Science, Khon Kaen University, Khon Kaen 40002, Thailand.

<sup>‡</sup> Division of Applied Chemistry, Graduate School of Engineering, Osaka University, Suita, Osaka 565-0871, Japan.

---

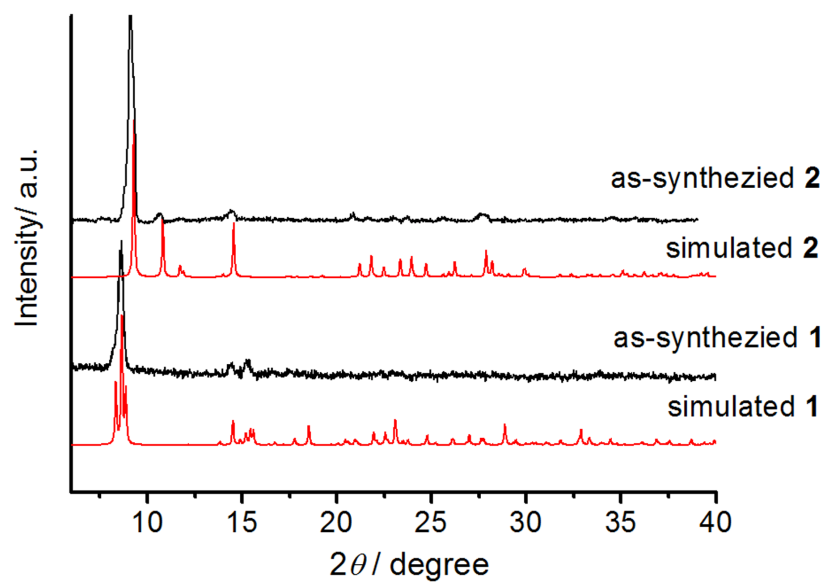

**Fig. S1** The simulated and experimental XRPD patterns of **1** and **2**.

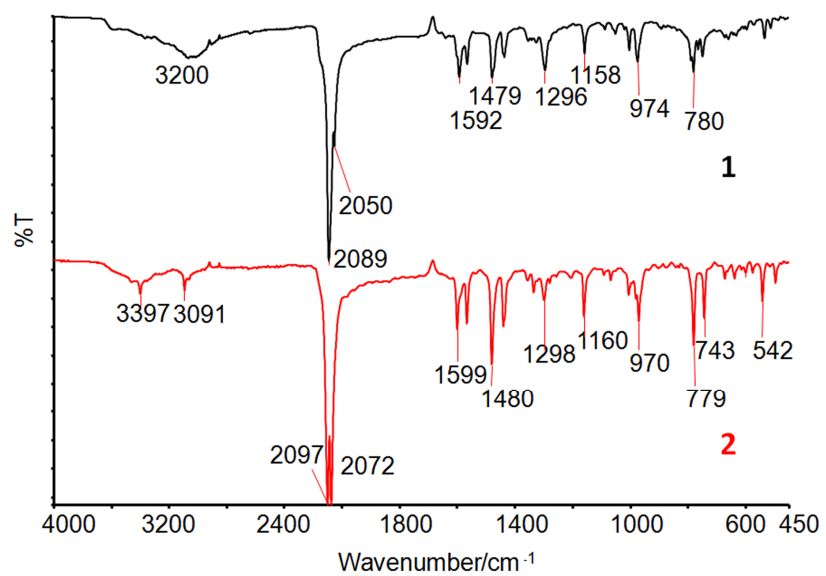

**Fig. S2** IR spectra of **1** and **2**.

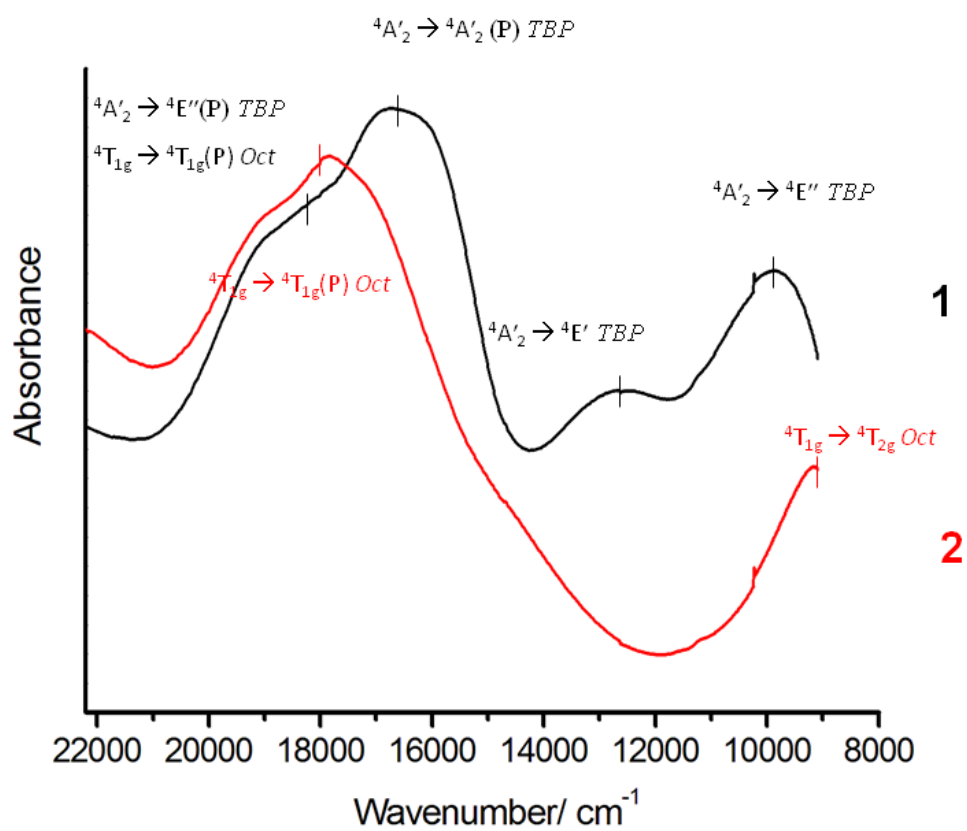

**Fig. S3** UV-Vis diffuse reflectance spectra of **1** and **2** with the d-d transitions labeled.<sup>a</sup>

(a) Lever, A. B. P. *Inorganic Electronic Spectroscopy*, 2nd ed., Elsevier, The Netherlands, 1984.

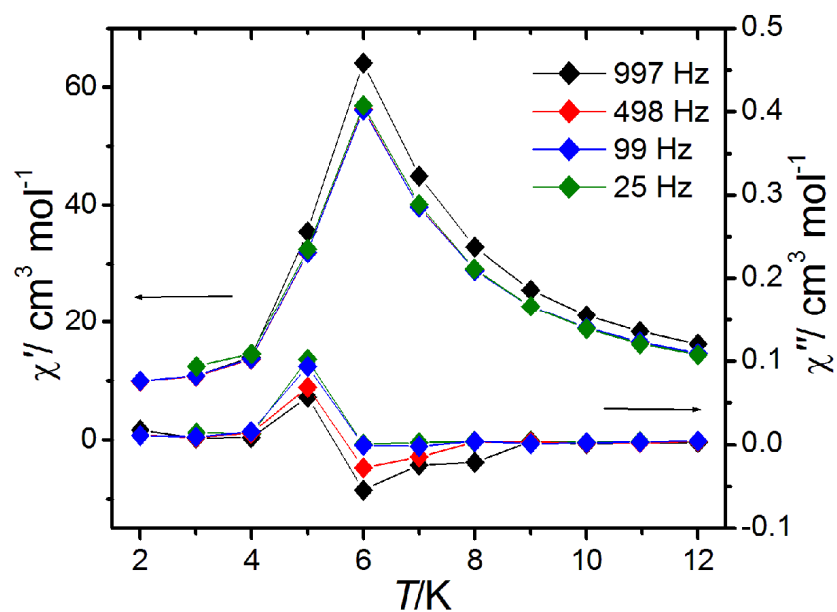

**Fig. S4** Temperature dependence of the *ac* susceptibility for **1** at  $H_{dc} = 0$  Oe,  $H_{ac} = 3$  Oe, with frequencies of 25 – 997 Hz.

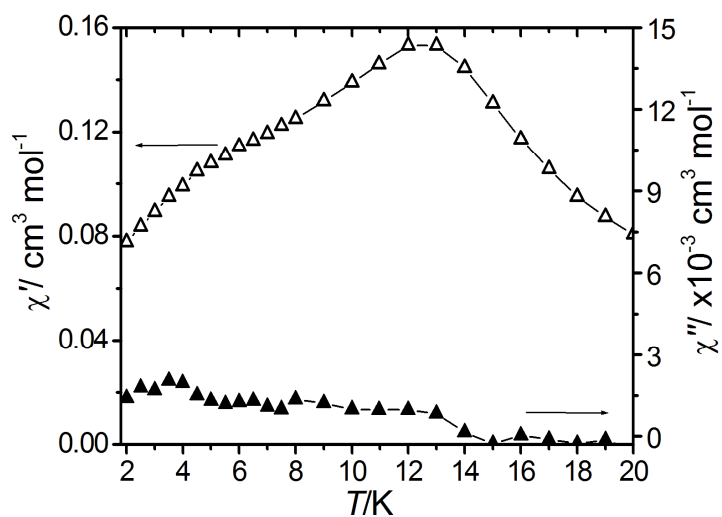

**Fig. S5.** Temperature dependence of the *ac* susceptibility for **2** at  $H_{dc} = 0$  Oe,  $H_{ac} = 3$  Oe, with frequency of 997 Hz.
